1 **EVALUATING THE IMPACT OF COVID-19 ON THE PREGNANCY AND POSTNATAL PERIOD**  
2 **FOR UK WOMEN**

3 **Gareth A Nye<sup>1</sup>, George Abou Deb<sup>1</sup>, Seóna Dunne<sup>2</sup>**

4 **Chester Medical School, University of Chester, Chester, CH1 4BJ**

5 **Nutrition and Health Sciences, University of Chester, Chester, CH1 4BJ**

6

7 **ABSTRACT**

8 **INTRODUCTION**

9 Pregnancy is a crucial period which ultimately directly impacts two individuals health and  
10 wellbeing. Within the UK, a standardised pattern of care is established with collaborations  
11 across disciplines to the benefit of women and babies. During the COVID19 pandemic, this  
12 pattern of care was disrupted to align with protective protocols which until now, has not  
13 been formally reported.

14 **METHODS**

15 A retrospective, mixed methods study of UK based women pregnant between the years  
16 2012 and 2022 inclusive with no known complications was conducted to collate opinions  
17 and experiences of pregnancy with and without the impact of COVID19 restrictions.  
18 Quantitative results were analysed using the statistical package GraphPad Prism 9.2.0 and  
19 presented as mean values +/- standard deviation where appropriate. In addition, we used a  
20 phased approach to open ended questions.

21 **RESULTS**

22 Our results showed no significant difference in either the number of appointments or the  
23 time of first appointment however an increased percentage of women reported the use of  
24 private services during the COVID pandemic. There was no change in the number of midwife  
25 appointments during the postnatal period during COVID but there was a significant  
26 reduction in the number of health visitor appointments. Overall, the COVID pandemic led to  
27 women feeling less satisfied with their care both during their pregnancy and postnatally, but

28 they reported that they continued to be listened to and remained feeling in control of their  
29 pregnancy.

## 30 **DISCUSSION**

31 Generally, the changes implemented during the COVID pandemic did not impact women's  
32 pregnancy journey substantially although we have no evidence of the long-term impact on  
33 child health and development. Clear themes have been established which can be used to  
34 further improve services in maternity and there are key elements to focus on for the future  
35 of UK maternity services.

36

## 37 **INTRODUCTION**

38 The impact of SARS-COV2 COVID19 has been felt across the world through the alteration of  
39 everybody's day to day lives <sup>1,2</sup>. This impact ranges from the devastating effects of the  
40 infection itself and the associated loss through to the financial burden on our economies  
41 and healthcare <sup>1-5</sup>.

42 In the United Kingdom (UK), a national lockdown was announced <sup>6</sup> and resulted in  
43 significant changes to the hospitals and how their services were delivered with many non-  
44 essential services paused <sup>7,8</sup>. As pregnancy is a time sensitive period, it was essential that  
45 maternity care was continued through the pandemic, albeit with significant changes to  
46 working practises and unprecedented challenges to keep services running. Initially, as the  
47 potential effects of COVID19 were of concern, Antenatal (ANC) clinic appointments were  
48 often conducted virtually and restrictions on the number of visitors and/or the presence of a  
49 birthing partner was seen universally <sup>9</sup>.

50 Previous studies focusing on patient anxiety showed 25.8% of respondents no longer  
51 attended in-person visits and due to large uncertainty around the birthing process and  
52 COVID-19 restrictions had collectively increased their anxiety <sup>10</sup>. This was in response to  
53 multiple reports of indirect effects of the pandemic leading to combined increased risk of  
54 maternal mortality and preterm birth <sup>10</sup>. We also saw reports on increases in maternal  
55 deaths through mental health conditions and suicides which were disproportionately seen  
56 in lower income settings <sup>11,12</sup>.

57 Now that services have returned to normal within the UK, it is time to retrospectively access  
58 and address the feelings of women who were pregnant during this period to look at areas of  
59 success in practice and areas to highlight moving forward, looking now towards the  
60 extended ramifications on our women and children who lived through the pandemic to  
61 gauge future healthcare challenges.

62 This paper aims to explore the impact of the COVID-19 pandemic on maternity services in  
63 the UK, including changes to antenatal, intrapartum and postnatal care, the experiences of  
64 pregnant women and healthcare professionals, and the implications for the future of  
65 maternity care. By examining the challenges and successes of UK maternity services during  
66 the pandemic, this paper aims to contribute to a broader understanding of the impact of  
67 COVID-19 on healthcare services and the lessons that can be learned for future pandemics  
68 and healthcare crises.

## 69 **Study Objectives**

70 The overall objective of this study was to collate the experiences of women who have been  
71 pregnant over a 10-year period between 2012 and 2022 to understand the potential impact  
72 COVID infection and lockdowns had on a women's perspective of their care.

## 73 **METHODS**

### 74 **Study design**

75 A retrospective study of women pregnant between the years 2012 and 2022 inclusive was  
76 conducted anonymously via a survey distributed on Facebook, Twitter, and pregnancy-  
77 related peer and professional communities from 20<sup>th</sup> February- 20<sup>th</sup> March 2022. Survey  
78 was designed to contain both quantitative and qualitative data through mixed methods of  
79 closed and open questioning and followed the Checklist for Reporting Results of Internet E-  
80 Surveys (CHERRIES) in its design and analysis<sup>13</sup>.

### 81 **Setting**

82 English-language online survey was open to any woman based within the United Kingdom at  
83 the time of their pregnancy.

### 84 **Participants**

85 Self-identified women who had been pregnant during the previous decade and were able to  
86 complete an online survey in English, recruited via Facebook and Twitter, including  
87 pregnancy-specific Facebook groups. The survey link was also shared with pregnancy-  
88 specific professional communities for distribution through their networks of pregnant  
89 women. For this paper, any women reporting a complication during their pregnancy (e.g.  
90 Gestational diabetes, hypertension or pre-eclampsia), or women with pre-existing  
91 conditions which would result in non-standard care during pregnancy were excluded from  
92 this report and will form the basis of future publications.

### 93 **Demographics and basic questions**

94 Participants were asked to complete questions based on maternal demographics and  
95 geographic locations. Additional pregnancy specific questions were asked to cover both the  
96 pregnancy and post natal period. General questions related to the COVID pandemic and  
97 vaccine were asked to all respondents with additional specific questions around COVID  
98 infection and changes to lifestyle during the pandemic asked to only respondents pregnant  
99 during the years 2020 to 2022 inclusive. Questions relating to participants feelings of  
100 satisfaction or otherwise were presented as a 1-10 numerical scale with 1 being the least  
101 and 10 being the most. Questions analysed for this study were as follows - How satisfied  
102 were you with the care you've received during pregnancy? How in control of your pregnancy  
103 did you feel? How do you feel your thoughts and concerns were managed during your  
104 pregnancy? How do you feel your postnatal care was?

### 105 **Data analysis**

106 Quantitative results were analysed using the statistical package GraphPad Prism 9.2.0 and  
107 presented as mean values +/- standard deviation where appropriate. Percentages were  
108 converted to the nearest whole number and presented as pre-2020 vs 2020-2022 values.  
109 Only uncomplicated pregnancies are reported in this study to exclude additional factors  
110 which may influence maternity care.

### 111 **Thematic analysis**

112 We used a phased approach to open ended questions inspired by Braun and Clarke<sup>14</sup> to  
113 identify patterns and themes. The phases are referred to; (1) Familiarisation with the data.

114 (2) Generating themes. (3) Reviewing themes. (4) Defining and naming themes. (5)  
115 producing the report<sup>14</sup>. We carried out the process of coding the material in a flexible way  
116 and moved back and forth through the phases as necessary<sup>15</sup>

## 117 **Ethics**

118 Ethical approval for this study was granted by the University of Chester Faculty of Medicine  
119 and Life Sciences Research Ethics Committee. Participants were asked to read and sign a  
120 participant information sheet before completing the survey. Data was anonymous at the  
121 point of survey completion.

## 122 **RESULTS**

### 123 **Patient demographics**

124 This survey returned a total of 274 respondents with 124 individual responses in the pre-  
125 2020 group and 154 responses pregnant during 2020-2022. There was an increased  
126 response rate from the North West England accounting for 40% of all responses with low  
127 response rates in Northern Ireland and Scotland. There were no significant difference in the  
128 mean maternal age of both groups with an average of 29.8 (+/- 5.0) years and 31.5 (+/- 4.6)  
129 years in the pre-2020/2020-2022 groups respectively. There was a higher rate of first-time  
130 pregnancies in the pre-2020 group (69% to 61%).

131 There were no significant differences in either the approximate number of appointments, or  
132 the approximate time of the first appointment in either group, but there was raise in the  
133 percentage of respondents using private care (11.8% vs 14.6%) and private scans (37% vs  
134 55%) during 2020-2022 when compared with the pre-2020 groups.

135 Interestingly, an increased percentage of births ending in planned c-sections were seen  
136 within the 2020-2022 group but no change in the percentage of midwife led vaginal  
137 deliveries. There were no changes in birth location nor any significant changes in mean birth  
138 weight.

139 There were differences in main feeding method at birth with a lower number of mothers  
140 choosing to breast fed in the 2020-2022 group (Bottle fed 18% vs 21%, Breast fed 72% vs  
141 63%, Combination 11% vs 15%), however by 6 months of age the percentage of mothers

142 breast feeding in the 2020-2022 group was higher than in the pre-2020 group (Bottle fed  
143 50% vs 43%, Breast fed 37% vs 48%, Combination 11% vs 8%).

144

#### 145 **Postnatal care**

146 No significant change in the number of midwife visits were reported between the groups  
147 and a higher percentage of women in the 2020-2022 reported having contact with a health  
148 visitor (91% vs 96%). However, women saw a decrease in health visitors attending in person  
149 appointments (91% vs 77%) and a rise in phone/remote appointments (5% vs 23%) in the  
150 2020-2022 group. A significant decrease in health visitor appointments were reported  
151 during this time (3.5 +/- 3.9 vs 2.6 +/- 1.8, P = 0.05).

152

#### 153 **Overall Satisfaction**

154 For each of the four questions asked related to the participants perception of their  
155 pregnancy, lower average self-reported scores from the group were seen in those pregnant  
156 during the years 2020-2022.

157 Significantly lower scores were reported for patient satisfaction in care during pregnancy,  
158 during the COVID time period (8.11 +/- 1.91 vs 7.26 +/- 2.20, P = <0.01) and significantly  
159 lower self reported scores for postnatal care during the same period (7.31 +/- 2.69 vs 5.95  
160 +/- 2.94, P = <0.01).

161 Level of control remained non significant, as did the management of concerns during  
162 pregnancy.

163

#### 164 **Impact of COVID pandemic on pregnancy period**

165 80% of respondents who were pregnant during the COVID pandemic faced a lockdown  
166 during their pregnancy to some extent, with 45% of respondents being under a lockdown  
167 during the time of delivery.

168 60% of those who answered faced a rearrangement of appointments to remove the face to  
169 face aspect with an average satisfaction score of 5.8 (+/-2.9) with these appointments, when  
170 using a 10 point scale.

171 Despite only 7% of respondents contracting COVID-19 during their pregnancy, 78% were  
172 concerned about the pandemic. 45% saw changes to the original birth plan and 14% of  
173 respondents shared that the pandemic influenced their decision making about infant  
174 feeding.

## 175 **Thematic analysis**

### 176 *Utilization of Private Care or scans during Pregnancy (pre-COVID-19)*

177 The thematic analysis unveiled that the majority of participants refrained from seeking  
178 private healthcare services during pregnancy. However, a notable subset of individuals  
179 opted for private care, driven by a diverse range of motivations. These motivations  
180 encompassed a preference for personalized one-to-one care, concerns regarding the  
181 accessibility of specific diagnostic tests, a desire for enhanced control over their healthcare  
182 decisions, proactive anxiety management, and a need for additional support and  
183 reassurance. Particularly, individuals with a history of miscarriage emphasized the  
184 significance of these factors. Key determinants for private scans included the desire for  
185 gender determination, the acquisition of multimedia keepsakes, and emotional reassurance  
186 with accessibility and timing of National Health Service (NHS) scans playing pivotal roles in  
187 respondents' decisions. These findings underscored the intricate and multifaceted nature of  
188 the factors that shape individuals' choices concerning pregnancy care.

### 189 *Pregnancy Care During the COVID-19 Pandemic*

190 In the context of the COVID-19 pandemic, the thematic analysis revealed that the  
191 predominant trend among participants during their pregnancy was the avoidance of seeking  
192 private healthcare services. Nevertheless, a minority of participants opted for private care,  
193 driven by various reasons, including prior miscarriages, pregnancy-related concerns, COVID-  
194 19 restrictions, and previous traumatic birth experiences. Some participants sought private  
195 care to ensure added assurance or to involve their partners in the pregnancy journey. The  
196 primary motivation for seeking private care predominantly stemmed from COVID-19

197 restrictions, which hindered access to NHS scans. This analysis underscored the multifaceted  
198 rationales for seeking private prenatal scans, encompassing reassurance, early gender  
199 determination, partner participation, and convenience. Notably, cost emerged as a potential  
200 barrier for certain families. The identified themes emphasized the complexity of the labour  
201 and delivery process, often necessitating medical interventions to ensure safety. This further  
202 underscored the importance of offering individualized and flexible healthcare options during  
203 pregnancy to accommodate the unique needs and preferences of expectant parents. It is  
204 noteworthy that the adoption of virtual appointments became prevalent during the  
205 pandemic, particularly for antenatal check-ups and health visitor assessments. However,  
206 some consultations with specialists remained in-person, and a subset of participants  
207 engaged in a combination of virtual and in-person appointments, highlighting the evolving  
208 landscape of healthcare delivery.

#### 209 *Impact of the COVID-19 Pandemic on Birth Plans*

210 The COVID-19 pandemic exerted a substantial influence on the birth plans of many  
211 respondents, resulting in a spectrum of modifications. These modifications ranged from  
212 restrictions on birth partners and visitors to changes in birthing locations and alterations in  
213 antenatal and postnatal care. The emotional and logistical challenges stemming from these  
214 changes underscored the importance of adaptability and flexibility during pregnancy and  
215 childbirth, particularly in times of uncertainty. The majority of respondents expressed  
216 concerns about various issues related to the pandemic, including anxieties surrounding  
217 partner restrictions during childbirth, limitations on visitation, and the broader impact of  
218 COVID-19 on pregnant women. Additional concerns included maternity ward closures and  
219 inadequate access to information. While some respondents were relatively unperturbed by  
220 pandemic-related issues, the prevailing sentiment was one of apprehension regarding the  
221 potential impact of the pandemic on their pregnancy and birthing experiences.

#### 222 *Infant Feeding Decisions during the Pandemic*

223 In terms of infant feeding decisions, the pandemic did not exert a significant influence on  
224 most participants. The majority reported a pre-existing determination to breastfeed that  
225 remained unaffected by the pandemic. A subset of participants mentioned that the  
226 pandemic heightened their resolve to breastfeed, while others perceived a lack of



227 breastfeeding support as a challenge. A minority of participants made the decision to  
228 formula feed, and these cases were relatively infrequent. Overall, the pandemic did not  
229 substantially impact infant feeding decisions.

### 230 *COVID-19 Infections during Pregnancy*

231 The thematic analysis of COVID-19 experiences during pregnancy revealed that the majority  
232 of respondents did not contract the virus, with only a few reporting infections. Hospital  
233 admissions due to COVID-19 during pregnancy were rare. Some mentioned losing their  
234 sense of taste without a positive test. Infections occurred at various gestational weeks, and  
235 most pregnancies proceeded without significant COVID-19-related complications.

### 236 *Reasons for Not Being Fully Vaccinated Against COVID-19*

237 Based on when the participant was pregnant, we see two very clear themes emerging. For  
238 those pregnant during the pre-COVID time period, answers included vaccine hesitancy or  
239 the reliance on natural immunity as reasons against, with others emphasising the  
240 importance of vaccination in safeguarding both personal health and the broader  
241 community. Taking responses from participants who were pregnant during the COVID  
242 period we see a change in themes with common themes among those who had not  
243 completed vaccination including concerns about breastfeeding, conflicting information,  
244 hesitancy due to the perceived experimental nature of vaccines during pregnancy, lack of  
245 research during pregnancy, and doubts about vaccine efficacy and transmission prevention.  
246 Some individuals mentioned waiting until they finished breastfeeding, receiving medical  
247 advice from midwives, having a needle phobia, relying on natural antibodies from previous  
248 infections, or opting not to disclose their reasons. These themes illuminate the complex  
249 factors shaping vaccination decisions during pregnancy.

## 250 **DISCUSSION**

251 In this study, a significant decrease in maternal satisfaction with the care received during  
252 pregnancy was observed in the period of 2020-2022 compared to pre-2020 levels. This may  
253 be attributed to the changes in the delivery of maternity services due to the COVID-19  
254 pandemic. No significant difference in the level of control mothers felt over their pregnancy

255 were reported suggesting that the COVID induced changes to maternity services did not  
256 impact women's sense of control .

257 There was a trend towards an increase in maternal age in the 2020-2022 period compared  
258 to pre-2020, although this was not statistically significant. This may reflect changing social  
259 trends, such as women delaying pregnancy for career or personal reasons or as this study  
260 observed a decrease in the proportion of first pregnancies in the 2020-2022 period  
261 compared to pre-2020, it could be women are reporting second pregnancies during COVID.

262 No significant differences were reported in the number of appointments attended or the  
263 timing of the first appointment between the two time periods studied which shows the  
264 ability of our healthcare system to maintain a standard level of care. An increase in the  
265 proportion of respondents who reported using private scans in the 2020-2022 period  
266 compared to pre-2020 was noted and is strongly suggested to be related to changes in the  
267 availability or accessibility of NHS scans during the pandemic. However, it is important to  
268 note that the use of private scans was still a minority practice overall.

269 In terms of mode of delivery, no significant differences were reported in the proportion of  
270 emergency or planned C-sections or vaginal deliveries between the two time periods  
271 studied. This suggests that changes to maternity services during the COVID-19 pandemic did  
272 not significantly impact the method of delivery for most women.

273 Finally, this study saw a decrease in the proportion of mothers who reported exclusively  
274 breastfeeding at birth and at 6 months postpartum in the 2020-2022 period compared to  
275 pre-2020. This may be reflective of changes to maternity services during the pandemic, such  
276 as decreased access to lactation support or changes in hospital policies related to  
277 breastfeeding. It might also be due to worries around the passing of COVID through breast  
278 milk from mother to baby. This indicates however a clear issue during the COVID time  
279 period and should be focused on to improve for any future pandemics.

## 280 **Post-natal care**

281 The postnatal care provided by midwives and health visitors is an important aspect of  
282 maternity services. In this study, we examined the changes in postnatal care during the  
283 COVID-19 pandemic in the UK. The results showed that there was a slight decrease in the

284 mean number of midwife visits to the home (3.1 +/- 2.0 visits pre-2020 vs 2.7 +/- 1.9 visits in  
285 2020-2022), but this difference was not statistically significant (p=0.23).

286 In terms of health visitor contacts, there was a significant decrease in the mean number of  
287 contacts (3.5 +/- 3.9 pre-2020 vs 2.6 +/- 1.8 in 2020-2022, p=0.05). This decrease could be  
288 due to several factors, such as increased workload for health visitors during the pandemic or  
289 changes in the way health visitor services were delivered during lockdowns. Interestingly,  
290 there was a significant increase in the percentage of respondents who reported having  
291 contact with a health visitor during the pandemic compared to pre-2020 (96% in 2020-2022  
292 vs 91% pre-2020, p<0.01) which may have been in response to the move to virtual  
293 appointments.

## 294 **CONCLUSION**

295 The results of this study suggest that the COVID-19 pandemic has had a negative impact on  
296 maternal satisfaction with care during pregnancy and postnatal care. The decrease in  
297 satisfaction with care during pregnancy and postnatal care is a cause for concern, as this  
298 may impact the physical and mental health outcomes of mothers and infants. The pandemic  
299 may have contributed to increased anxiety and stress for pregnant and postnatal women,  
300 which may have impacted their perceptions of care.

301

302 The reduction in face-to-face consultations may have led to a lack of personal connection  
303 with healthcare professionals and decreased opportunities for discussion and support.  
304 Virtual consultations may not have been sufficient to replace in-person consultations and  
305 may have contributed to a perception of a lack of support. Women may have also found it  
306 difficult to access information about available services and may have experienced difficulties  
307 accessing appropriate care due to reduced staffing levels and resources.

308

309 Additionally, the study found a significant decrease in maternal perception of how their  
310 thoughts and concerns were managed during pregnancy, suggesting that healthcare  
311 professionals may need to improve their communication and support for women during the  
312 pandemic. During the pandemic, it was challenging for healthcare professionals to provide

313 the same level of support as they did pre-pandemic due to increased demands on their  
314 time, resources, and a lack of personal contact with patients. Virtual consultations may have  
315 also contributed to difficulties in communication, as non-verbal cues and physical  
316 examination were not possible.

317

318 Despite the challenges posed by the pandemic, there was no significant difference in  
319 maternal perception of control during pregnancy, indicating that women still felt in control  
320 of their pregnancies. This may be due to the availability of virtual consultations and the  
321 continued provision of essential antenatal care. It may also reflect the resilience of women  
322 during the pandemic and their ability to adapt to changes in healthcare services.

323

324

325

326

## 327 REFERENCES

- 328 1. Baker MA, Sands KE, Huang SS, et al. The impact of coronavirus disease 2019 (COVID-19) on  
329 healthcare-associated infections. *Clinical Infectious Diseases*. 2022;74(10):1748-1754.
- 330 2. Sabetkish N, Rahmani A. The overall impact of COVID-19 on healthcare during the pandemic:  
331 a multidisciplinary point of view. *Health Science Reports*. 2021;4(4):e386.
- 332 3. Chudasama YV, Gillies CL, Zaccardi F, et al. Impact of COVID-19 on routine care for chronic  
333 diseases: a global survey of views from healthcare professionals. *Diabetes & Metabolic Syndrome:  
334 Clinical Research & Reviews*. 2020;14(5):965-967.
- 335 4. Naseer S, Khalid S, Parveen S, Abbass K, Song H, Achim MV. COVID-19 outbreak: Impact on  
336 global economy. *Frontiers in public health*. 2023;10:1009393.
- 337 5. Rodríguez BO, Sánchez TL. The Psychosocial Impact of COVID-19 on health care workers.  
338 *International braz j urol*. 2020;46:195-200.
- 339 6. Mensah AA, Stowe J, Jardine JE, et al. Covid-19 vaccine safety in pregnancy, a nested case-  
340 control study in births from April 2021 to March 2022, England. *medRxiv*. 2023:2023.10.  
341 09.23296737.
- 342 7. Ball S, Banerjee A, Berry C, et al. Monitoring indirect impact of COVID-19 pandemic on  
343 services for cardiovascular diseases in the UK. *Heart*. 2020;106(24):1890-1897.
- 344 8. Bardet A, Fraslin AM, Marghadi J, et al. Impact of COVID-19 on healthcare organisation and  
345 cancer outcomes. *European Journal of Cancer*. 2021;153:123-132.
- 346 9. Di Mascio D, Khalil A, Saccone G, et al. Outcome of coronavirus spectrum infections (SARS,  
347 MERS, COVID-19) during pregnancy: a systematic review and meta-analysis. *American journal of  
348 obstetrics & gynecology MFM*. 2020;2(2):100107.

- 349 10. Moyer CA, Compton SD, Kaselitz E, Muzik M. Pregnancy-related anxiety during COVID-19: a  
350 nationwide survey of 2740 pregnant women. *Archives of women's mental health*. 2020;23:757-765.
- 351 11. Kasaven LS, Raynaud I, Jalmbant M, Joash K, Jones BP. The impact of the COVID-19  
352 pandemic on perinatal services and maternal mental health in the UK. *BJPsych Open*. 2023;9(1):e13.
- 353 12. Penna AL, de Aquino CM, Pinheiro MSN, et al. Impact of the COVID-19 pandemic on  
354 maternal mental health, early childhood development, and parental practices: a global scoping  
355 review. *BMC public health*. 2023;23(1):388.
- 356 13. Eysenbach G. Improving the quality of Web surveys: the Checklist for Reporting Results of  
357 Internet E-Surveys (CHERRIES). Gunther Eysenbach Centre for Global eHealth Innovation, Toronto,  
358 Canada; 2004. p. e34.
- 359 14. Braun V, Clarke V. Conceptual and design thinking for thematic analysis. *Qualitative*  
360 *psychology*. 2022;9(1):3.
- 361 15. Braun V, Clarke V. Reflecting on reflexive thematic analysis. *Qualitative research in sport,*  
362 *exercise and health*. 2019;11(4):589-597.
- 363
